RESEARCH ARTICLE

# Sequential Targeting of CD52 and TNF Allows Early Minimization Therapy in Kidney Transplantation: From a Biomarker to Targeting in a Proof-Of-Concept Trial

Ondrej Viklicky<sup>1,2\*</sup>, Petra Hruba<sup>2</sup>, Stefan Tomiuk<sup>3</sup>, Sabrina Schmitz<sup>3</sup>, Bernhard Gerstmayer<sup>3</sup>, Birgit Sawitzki<sup>4,5</sup>, Patrick Miqueu<sup>6,7</sup>, Petra Mrazova<sup>2</sup>, Irena Tycova<sup>2</sup>, Eva Svobodova<sup>8</sup>, Eva Honsova<sup>9</sup>, Uwe Janssen<sup>3</sup>, Hans-Dieter Volk<sup>4,5,†</sup>, Petra Reinke<sup>5,10,‡</sup>

**1** Department of Nephrology, Institute for Clinical and Experimental Medicine, Prague, Czech Republic, **2** Transplant Laboratory, Institute for Clinical and Experimental Medicine, Prague, Czech Republic, **3** Miltenyi Biotec GmbH, Bergisch Gladbach, Germany, **4** Institute of Medical Immunology, Charité University Medicine Berlin, Germany, **5** Berlin-Brandenburg Center for Regenerative Medicine (BCRT), Charité University Medicine Berlin, Germany, **6** Institut National de la Santé et de la Recherche Médicale INSERM U1064, France, **7** Institut de Transplantation Urologie Néphrologie du Centre Hospitalier Universitaire Hôtel Dieu, Nantes, France, **8** Department of Immunogenetics, Institute for Clinical and Experimental Medicine, Prague, Czech Republic, **9** Department of Clinical and Transplant Pathology, Institute for Clinical and Experimental Medicine, Prague, Czech Republic, **10** Department of Nephrology and Intensive Care Medicine, Charité University Medicine Berlin, Germany

\* These authors contributed equally to this work.

† These authors are joint senior authors on this work.

\* [ondrej.viklicky@ikem.cz](mailto:ondrej.viklicky@ikem.cz)

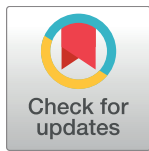

**OPEN ACCESS**

**Citation:** Viklicky O, Hruba P, Tomiuk S, Schmitz S, Gerstmayer B, Sawitzki B, et al. (2017) Sequential Targeting of CD52 and TNF Allows Early Minimization Therapy in Kidney Transplantation: From a Biomarker to Targeting in a Proof-Of-Concept Trial. PLoS ONE 12(1): e0169624. doi:10.1371/journal.pone.0169624

**Editor:** Jose Ignacio Herrero, Universidad de Navarra, SPAIN

**Received:** March 19, 2016

**Accepted:** December 11, 2016

**Published:** January 13, 2017

**Copyright:** © 2017 Viklicky et al. This is an open access article distributed under the terms of the [Creative Commons Attribution License](https://creativecommons.org/licenses/by/4.0/), which permits unrestricted use, distribution, and reproduction in any medium, provided the original author and source are credited.

**Data Availability Statement:** The relevant data are within the paper and its Supporting Information files, microarray results are available through GEO Series accession number GSE39299 (<http://www.ncbi.nlm.nih.gov/geo/query/acc.cgi?token=rctnosmwwkoavs&acc=GSE39299>).

**Funding:** This work was supported by Riset (EU FP6 program) and Bio-DrIM (EU FP7 program). O. V. is the recipient of grants from the Internal Grant Agency of the Ministry of Health of the Czech

## Abstract

### Background

There is high medical need for safe long-term immunosuppression monotherapy in kidney transplantation. Selective targeting of post-transplant alloantigen-(re)activated effector-T cells by anti-TNF antibodies after global T cell depletion may allow safe drug minimization, however, it is unsolved what might be the best maintenance monotherapy.

### Methods

In this open, prospective observational single-centre trial, 20 primary deceased donor kidney transplant recipients received 2x20 mg Alemtuzumab (d0/d1) followed by 5 mg/kg Infliximab (d2). For 14 days all patients received only tacrolimus, then they were allocated to either receive tacrolimus (TAC, n = 13) or sirolimus (SIR, n = 7) monotherapy, respectively. Protocol biopsies and extensive immune monitoring were performed and patients were followed-up for 60 months.

### Results

TAC-monotherapy resulted in excellent graft survival (5yr 92%, 95%CI: 56.6–98.9) and function, normal histology, and no proteinuria. Immune monitoring revealed low intragraft

Republic NT14102-3/2013 and AZV ČR 15-26865A and MH CZ DRO (“Institute for Clinical and Experimental Medicine – IKEM, IN 00023001”). Miltenyi Biotec GmbH provided support in the form of salaries for authors [S.T., S.S., U.J., B.G.], but did not have any additional role in the study design, data collection and analysis, decision to publish, or preparation of the manuscript. The specific role of these authors is articulated in the ‘author contributions’ section.

**Competing Interests:** O.V. received lecture fees from Sanofi. S.T., S.S., U.J., and B.G. were employed by Miltenyi Biotec GmbH, Germany. This does not alter the authors’ adherence to PLOS ONE policies on sharing data and materials.

**Abbreviations:** AMR, Antibody Mediated Rejection; BKV, BK Viremia; CMV, Cytomegalovirus; CNI, Calcineurin Inhibitors; d, day(s); DSA, Donor Specific Antibodies; EBV, Epstein-Barr virus; i.v., intravenous(ly); M, month(s); MMF, Mycophenolate Mofetil; PBMC, Peripheral Blood Mononuclear Cell; PCR, Polymerase Chain Reaction; PoC, Proof-of-Concept; POD, postoperative day; SIR, Sirolimus; TAC, Tacrolimus; Teff, T effector cell; TCMR, T Cell Mediated Rejection; tm, transmembrane; TNF, Tumor Necrosis Factor; Tx, Transplantation; W, week(s); yr, year(s).

inflammation (urinary IP-10) and hints for the development of operational tolerance signature in the TAC- but not SIR-group. Remarkably, the TAC-monotherapy was successful in all five presensitized (ELISPOT+) patients. However, recruitment into SIR-arm was stopped (after  $n = 7$ ) because of high incidence of proteinuria and acute/chronic rejection in biopsies. No opportunistic infections occurred during follow-up.

## Conclusions

In conclusion, our novel fast-track TAC-monotherapy protocol is likely to be safe and preliminary results indicated an excellent 5-year outcome, however, a full-scale study will be needed to confirm our findings.

## Trial Registration

EudraCT Number: [2006-003110-18](https://www.eudra-ct.eu/number/2006-003110-18)

## Introduction

Minimization of immunosuppression is a major task for improving long-term outcome and decreasing direct and indirect costs after kidney transplantation [1]. Minimization however increases the risk of rejection, particularly in high-responder patients [2, 3]. Recent research focusses on biomarkers for identifying patients who need less immunosuppression in order to allow biomarker-driven safe minimization ([www.biodrim.eu](http://www.biodrim.eu)) [4, 5]. Several groups demonstrated that the occurrence of high levels of donor-reactive memory/effector T cells as detected by Elispot-analysis is associated with poorer outcome [6–8]. Very recent data suggest, stratification of patients based on the pretransplant Elispot seems to allow safe CNI-free immunosuppression in some kidney transplant patients [9]. However, as this approach is limited to the subset of “low-responder” patients only, novel therapeutic strategies are needed to convert the majority of patients into “low responders” allowing minimization of immunosuppression. A robust protocol reaching this goal is not available [10].

Minimization of immunosuppression seems to be supported by profound peri-transplant immune cell depletion as result of reduced clonal size of alloreactive T/B cells. However, controversial outcome on minimized immunosuppression after depletion induction has been reported [11, 12]. Beside profound depletion/control of T cells, particularly early post-transplant, long-term control of alloresponse is dependent on active regulatory mechanisms [13–15], which may be further enhanced by mTOR inhibitors such as sirolimus [16].

Induction therapy with depleting biologics (polyclonal rabbit antithymocyte globulin or alemtuzumab) has been shown to be associated with expansion of regulatory cells [17, 18]. However, depleting agent alone was not enough for successful minimization to tacrolimus monotherapy, even in preselected patients [19]. Possible explanation for the conflicting results is the relative resistance of memory/effector T/B cells to depleting antibodies in presensitized patients and their preferential (alloantigen-driven) expansion in the lymphopenic recipient [20]. So donor-specific Teff cells represent not only a biomarker for patients’ stratification but also a promising therapeutical target.

TNF plays a key role in activating innate and adaptive immune response. In its soluble form, TNF-trimers can trigger multiple inflammatory reactions on multiple receptor-bearing target cells [21]. It was previously shown that memory and / or effector T cells express

membrane bound TNF and are susceptible to anti-TNF antibody mediated complement-dependent lysis [22]. In addition, TNF monomers, dimers, and trimers are transiently detectable as transmembrane molecules on recently activated T and innate immune cells [23]. In contrast to the TNF-receptor fusion protein, etanercept, that binds only the soluble TNF, anti-TNF antibodies, like infliximab, bind also strongly to transmembrane TNF (tmTNF+) on (re)activated immune cells and induce apoptosis of targeted tmTNF+ cells both *in vitro* and *in vivo* [22, 24, 25], own unpublished observations). As the tmTNF expression is very transient following (re)activation, targeting of tmTNF+ cells is relatively selective for very recently activated effector cells.

Therefore, we hypothesized that few days after transplantation alloantigen-(re)activated memory/effector cells can be specifically targeted. To test the hypothesis that anti-TNF mAb if given at right time post-transplantation might allow safe monotherapy in almost all patients, we performed a Proof-of-Concept (PoC) trial, supported by the European Programs (RISET and BIO-DrIM networks). Primary deceased donor kidney transplant recipients received sequential induction therapy with alemtuzumab and infliximab followed either by tacrolimus or sirolimus monotherapy. The data from 5 year follow-up support our concept and suggest safety and efficacy of new induction approach with early tacrolimus monotherapy that was associated with regulatory B-cell gene signature and control of intrarenal inflammation.

## Methods

### Study design and patients

The study was originally planned as prospective 12 months open label single centre PoC study, and approved by the IRB of the Institute for Clinical and Experimental Medicine, Prague, the State Institute for Drug (1012/06) and Healthcare products Regulatory Agency (European Union Drug Regulating Authorities Clinical Trials [EudraCT] Number 2006-003110-18) under the umbrella of the 6<sup>th</sup> Frame Program of the European Union “Reprogramming the Immune System for the Establishment of Tolerance (RISET)” project (clinicaltrials.gov register entry: NCT02711202). Follow-up analyses were supported by the 7<sup>th</sup> Frame Program of the EU “Biomarker-driven Immunosuppression (Bio-DrIM)” project. The Ethics Committee of the Institute for Clinical and Experimental Medicine approved the study protocol and all patients signed informed consent to participate in the study (No. 1012/06). The primary endpoint of the study was patient and graft survival at 12 months. The secondary endpoints were as follows: graft function estimated by serum creatinine, frequency of biopsy proven rejection at 1 year, intrarenal and peripheral blood expression of rejection- or tolerance-associated genes. None of the transplant donors were from vulnerable population and all donors or next of kin provided consent that was freely given. We enrolled 20 primary low risk kidney transplant recipients (Table 1), the inclusion and exclusion criteria are described in detail below. The first patient was enrolled on January 2007 and the last one on March 2009. According to recommendation for studies dealing with minimization strategies [26], the patient enrollment was slow to allow careful patient monitoring, this means not all available patients were included in the study. Protocol safety and efficacy was evaluated repeatedly by DSMB. Participants were enrolled consecutively by physician and assigned according to patient order (odd and even) when entering the study by study coordinator. After the treatment allocation of the first 14 patients, the last 6 patients were assigned only into the TAC-group because of limited efficacy observed in the SIR-group (Fig 1). All but one tacrolimus monotherapy treated patients have continued until M60, while at M36, all sirolimus monotherapy assigned patients were off scheduled therapy (S1 Table). Prospective immune monitoring was performed before transplantation and at POD21, M2, M3, M6 and M12. Protocol kidney graft biopsies were

**Table 1. Clinical and demographic characteristics of kidney transplant recipients in TAC- and SIR-group.**

|                                    | Tacrolimus     | Sirolimus        | P value |
|------------------------------------|----------------|------------------|---------|
| <b>N</b>                           | 13             | 7                |         |
| <b>Patient age, y*</b>             | 55 [20; 63]    | 46 [26; 55]      | 0.03    |
| <b>Donor age, y*</b>               | 53 [26; 63]    | 53 [41; 62]      | 0.55    |
| <b>HLA mismatch *</b>              | 3 [1; 4]       | 3 [2; 3]         | 0.81    |
| <b>Peak PRA*</b>                   | 2 [0; 8]       | 2 [0; 8]         | 0.27    |
| <b>Cold ischemia, hours, range</b> | 18.9 (13.5–25) | 19.2 (16.1–23.5) | 0.84    |
| <b>Cause of renal failure</b>      |                |                  |         |
| IgA nephropathy                    | 2              | 2                |         |
| Glomerulonephritis                 | 3              | 1                |         |
| Diabetic or ischemic nephropathy   | 0              | 1                |         |
| TIN                                | 2              | 1                |         |
| Nephrosclerosis                    | 4              | 2                |         |
| Others                             | 2              | 0                |         |

\* median [min; max]

doi:10.1371/journal.pone.0169624.t001

performed at POD21 (a week after conversion to sirolimus in the conversion arm), and at 3M and 12M. Clinical data were followed post-study 12M period until M60 to better describe safety and efficacy of this protocol. To compare the outcome of study groups with standard of care triple immunosuppression treated patients, 174 patients fulfilling the same inclusion criteria were involved.

### Inclusion and exclusion criteria

The inclusion criteria were as follows: first deceased-donor kidney transplantation, age > 18 years, donor < 65 years, CMV/EBV seropositivity, panel reactive antibody (PRA) < 10% and written consent with the participation in the study.

The exclusion criteria were as follows: previous transplantation, combined transplantation, immunosuppression less than 6 months prior transplantation, induction therapy with antibodies, leukopenia < 4000, thrombocytopenia < 100 000, haemoglobin < 80 g/l, previous therapy with ATG, anti-CD3 monoclonal antibody or anti-TNF- $\alpha$  monoclonals, tuberculosis history, positivity of anti-HCV positivity, HBsAg, HIV, history of malignancy, allergy to study medication, fertile women without contraception, pregnancy, and breastfeeding mothers.

### Immunosuppression

Alemtuzumab (Genzyme Europe B.V. Naarden, The Netherlands) 20 mg diluted in saline was given in two slow i.v. infusions doses before reperfusion of the allograft and on the first day as described by others [27]. Thirty minutes before each alemtuzumab application, patients received methylprednisolone 500mg i.v.

Infliximab (Janssen Biologics B.V. Leiden, The Netherlands) was given as a single dose at 5mg/kg diluted in 500 mL of saline at d2 and before application patients had received hydrocortisone 100mg as a local praxis. Infliximab dose was chosen as recommended for the Crohn's disease therapy.

Before the surgery, patients were randomized to receive either long-term tacrolimus or sirolimus monotherapy from day 15 postoperation while the first 14 days all patients received tacrolimus monotherapy. The reason for delayed switch to sirolimus was the negative impact

**CONSORT**  
TRANSPARENT REPORTING of TRIALS

CONSORT 2010 Flow Diagram

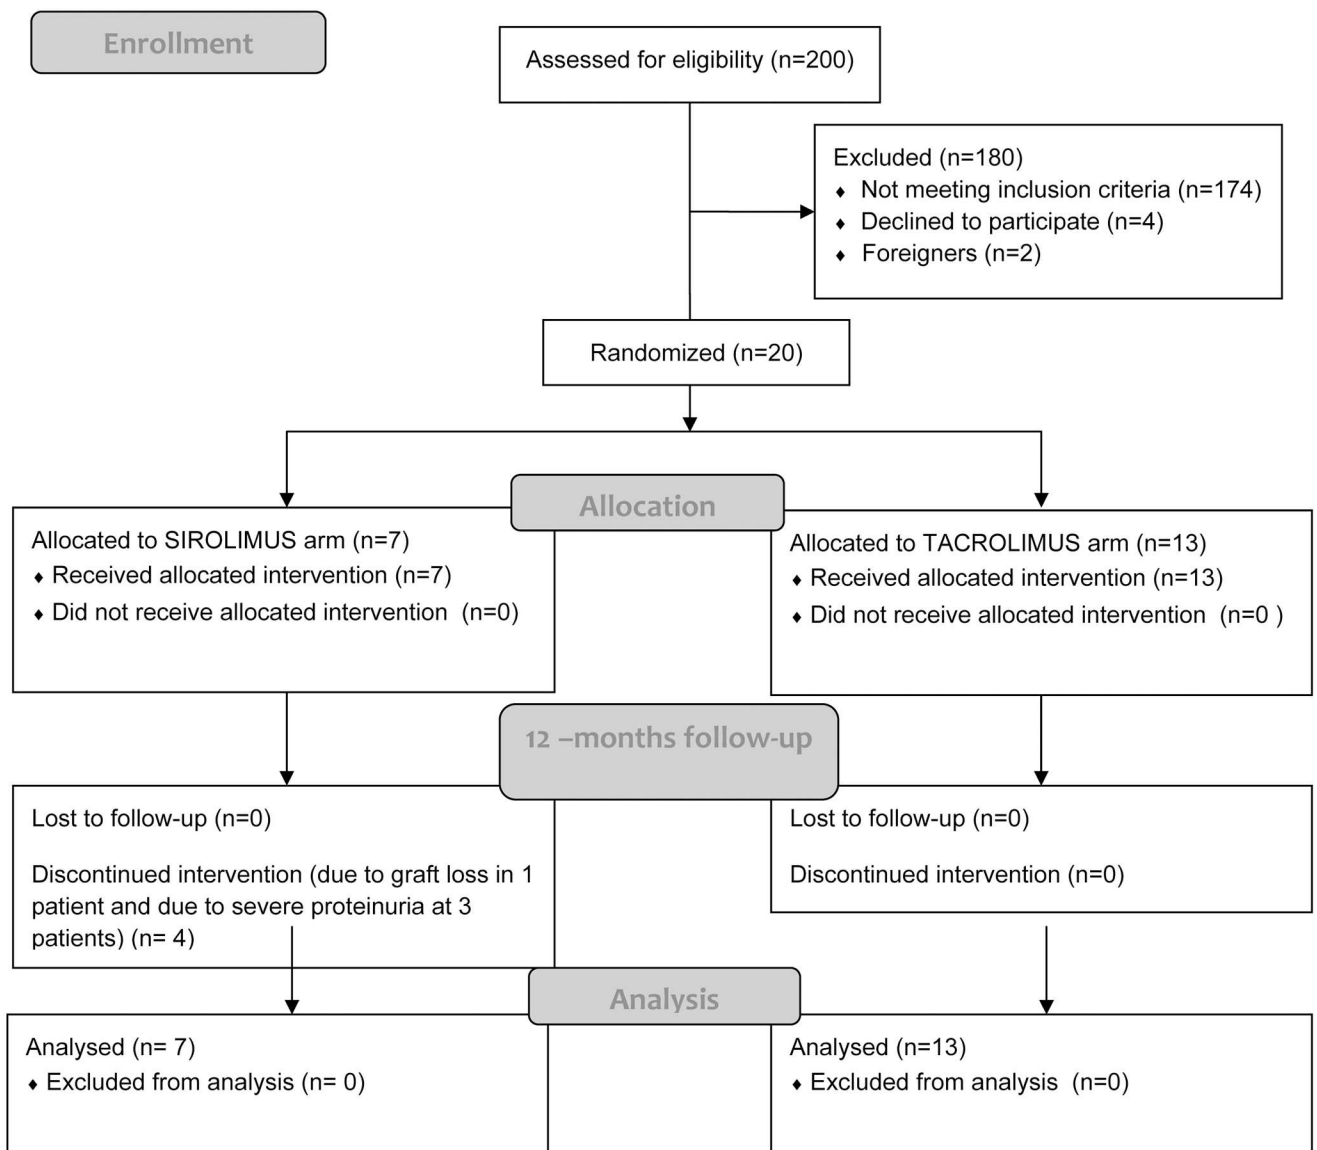

**Fig 1. Consort 2010 flow diagram.**

doi:10.1371/journal.pone.0169624.g001

of rapamycin on wound healing and the recent observation of higher antibody-mediated rejection rates in patients treated with sirolimus monotherapy immediately after Alemtuzumab induction [28]. Tacrolimus (Prograf<sup>®</sup>, Astellas) was given in standard doses 0.1mg/kg bid, the first dose was given before surgery. Two days post operation, the whole blood trough levels were evaluated and target levels were 10–15 ng/mL for the first month, 5–15 ng/ml for the first 3 months and 5–10ng/ml later on.

Sirolimus (Rapamune<sup>®</sup>, Wyeth), 4 mg morning dose, was given from day 15 on. In this arm, the last tacrolimus dose was given 24 hours before. Long-term sirolimus trough levels were 5–10 ng/mL. In patients with early acute rejection within the first 14 days the study protocol allowed later sirolimus switch.

In a case of case biopsy-confirmed clinically relevant acute or chronic rejections, patients got additionally mycophenolate mofetil and/or steroids maintenance therapy as appropriate.

### Monitoring viral infections and anti-infective prophylaxis

BK Polyomavirus (BKV) loads were determined in the urine and blood while cytomegalovirus (CMV) and Epstein-Barr virus (EBV) were determined in the blood using PCR at POD14, M1, 2 and 3.

All patients received CMV prophylaxis with intravenous ganciclovir for the first week followed for 90 days oral valganciclovir prophylaxis. According to local IRB recommendation each patient received nindrazid 300 mg daily prophylaxis for 6 months along with vitamin B6 substitution. CMV/EBV seronegative recipients were excluded from this study.

### Biopsies

Protocol kidney graft biopsies were performed routinely on d21, M3 and M12 and case biopsies were indicated in clinical suspicion of rejection or significant proteinuria. Renal biopsies were obtained under ultrasound guidance (Toshiba, Power Vision 6000) using a 14-gauge Tru-Cut needle (Uni-Cut Nadeln, Angiomed, Germany). Most of the renal tissue was processed for conventional histology. Histological examination was interpreted according to the 2005 Banff classification criteria. The residual portion (2mm) of the cortical or juxtamedullary zone of the renal tissue were immediately placed in RNA later (Ambion Corporation, Austin, TX), snap frozen and stored at -80°C until RNA extraction.

### Immune monitoring

**Flow cytometry.** Peripheral blood mononuclear cells (PBMC) were isolated by density gradient centrifugation and flow cytometric analysis was performed according to standard protocols using the following antibodies (clone): anti-CD4-PE (13B8.2), anti-CD8-ECD (SFC121Thy2D3), anti-CD19-ECD (J3-119) or anti-CD3-PC5 (UCHT1). Following staining, samples were analyzed using an FC 500 flow cytometer (Beckman Coulter, Brea, CA, USA) and CxP and Kaluza software (Beckman Coulter, Brea, CA, USA).

**Quantification of urinary IP-10 protein expression.** Urinary samples were collected (2x2ml) and frozen at -80°C until measurement in bulk analyses using an Enzyme-linked immunosorbent assay (IP-10 Elisa Hycult HK311). Based on recent data, normal levels are <100 pg/ml and levels of >200 pg/ml indicate intragraft inflammation, mostly related to alloreactivity [29].

**ELISpot.** ELISpot was performed as described elsewhere [4]. Briefly, liquid nitrogen-frozen peripheral blood mononuclear cells (PBMC ( $3 \times 10^5$  cells/well)) were stimulated for 24 hours with donor cells (1:1), CMV-pp65/IE-1 peptide pool, SEB (positive control), or culture media (negative control). Spots were counted using the AID-Reader. Relevant donor response was

defined at > 20 spots/300,000 PBMC and high-risk patients at > 200 Spots/300,000 PBMC [9]. Because of profound depletion, only pretransplant samples were analyzed.

**Antibody testing.** The specificity of HLA and MICA antibodies was defined by LABScreen Mixed and Single Antigen (SAB) class I and class II beads (OneLambda Inc.) in serum of patients at M36 posttransplant according to the manufacturer's protocol. Samples were analyzed by the Luminex 200 flowanalyzer (One Lambda Inc.) using the HLA Fusion software (version no.2). Beads with normalized mean fluorescence intensity (MFI) values >1000MFI (class I) and 2000MFI (class II) were considered to be DSA positive.

## Whole blood microarray

**RNA isolation.** RNA was isolated from peripheral blood, collected before Tx, and at W3, M2, M3, M6 and M12 posttransplant, using the PAXgene Blood RNA kit (Qiagen, Hilden, Germany) according to manufacturer's instructions. Peripheral vein blood was drawn directly into PAXgene Blood RNA tubes (Qiagen, Hilden, Germany) and stored at -20°C until analysis. Quality and integrity of PAXgene RNA were determined using the Agilent RNA 6000 Nano Kit on the Agilent 2100 Bioanalyzer (Agilent Technologies). Samples with RNA integrity number below five were excluded from microarray hybridization.

**RNA amplification and labeling.** The protocol of RNA amplification and labeling was slightly modified to enable processing of samples in a 96 well format. Briefly, 150 ng of each total RNA in 1.5 µl bidest H<sub>2</sub>O was pipetted in the respective well of a 96 well plate (4titude). To each well, 2 µl Spike-In and 1.8 µl T7 Primer (both Agilent Technologies) were added, the plate was sealed and samples were incubated for 10 min. at 65°C, followed by a subsequent cooling step to 4°C. 2 µl 5x First Strand Buffer, 1 µl 0.1 M DTT, 0.5 µl 10 mM dNTP and 1.2 µl Affinity Script RNase Block mix were added and incubated for another 120 min at 40°C, followed by 15 min at 65°C and then cooled down the plate to 4°C. The amplification and labeling step was performed by adding 0.75 µl bidest H<sub>2</sub>O, 3.2 µl 5x transcription buffer, 0.6 µl 0.1 M DTT, 1 µl NTP mix, 0.21 µl T7 RNA polymerase and 0.24 µl Cyanine 3-CTP and incubating the samples for 120 min at 40°C, followed by cooling the plate to 4°C. For purification of labeled cRNAs, to each well 84 µl bidest H<sub>2</sub>O was added and the entire 100 µl were transferred to a 96 deep well plate (Greiner Bio One, Ref. 780271). To this plate 350 µl RLT buffer and 250 µl ETOH were added, mixed and 700 µl per labeled cRNA was transferred to the 96 sample plate (Qiagen, Hilden, Germany) and further processed according to [30]. Yields of cRNA and the dye incorporation rate were measured with the ND-1000 Spectrophotometer (Thermo Scientific).

**Hybridization of RISET 2.0 Agilent custom microarrays.** Hybridization of *RISET 2.0 Agilent custom microarrays* was performed as described elsewhere in detail [31]. Briefly, 0.6 µg Cy3-labeled fragmented cRNA in hybridization buffer was hybridized overnight (17 hours, 65°C) to RISET 2.0 microarrays [32] and subsequently washed.

**Scanning and data analysis.** Scanning and data analysis were performed using Agilent's Microarray Scanner System (Agilent Technologies Inc.). The Agilent Feature Extraction Software (FES version 10.5.1.1) was used to read out and process the microarray image files. FES-derived output data files were further processed using the Rosetta Resolver gene expression data analysis system (version 7.1.0.2., Rosetta Inpharmatics LLC). The data have been deposited in NCBI's Gene Expression Omnibus [33] and are accessible through GEO Series accession number GSE39299 (<http://www.ncbi.nlm.nih.gov/geo/query/acc.cgi?acc=GSE39299>). Heatmaps of top-ranked differentially expressed genes were constructed using MultiExperiment Viewer 4.6.0 (TM4, Boston, MA) [34].

**Microarray statistical analysis.** After inter-array quantile normalization, two-tailed t-tests (unequal variance) were conducted in order to identify genes with statistically significant

expression differences ( $p \leq 0.05$ ) between two sample groups. The statistical test was complemented by a non-statistical quantification of the median expression difference.

Lists of genes found to be discriminatory between different sample groups were analyzed for a statistically significant enrichment of biological pathway annotation terms in comparison to the complete RISET 2.0 microarray configuration. Term enrichment relative to the expected background distribution was scored using Fisher's exact test. Annotations were derived from different sources, e.g., Gene Ontology (GO, [www.geneontology.org](http://www.geneontology.org)), signaling pathway membership, sequence motifs, chromosomal proximity, literature keywords, and cell-specific marker genes.

## RT-qPCR analysis

The most differently expressed genes revealed by microarray analysis of blood samples using the RISET microarray platform and genes associated with transplantation tolerance published elsewhere [31] were next validated by RT-qPCR analysis. For RT-qPCR analysis the following probes were used (CD79B-Hs00236881\_m1, CD200-Hs01033303\_m1, CD247-Hs00167901\_m1, C4A; LOC100293534; C4B-Hs00246758\_m1, FN1-Hs01549976\_m1, FCRL1-Hs00364705\_m1, FCRL2-Hs00229156\_m1, HS3ST1-Hs01099196\_m1, IL8-Hs99999034\_m1, IRF5-Hs00158114\_m1, MS4A1-Hs00174849\_m1, PNOG-Hs00918595\_m1, SH2D1B-Hs01592483\_m1, SLC8A1-Hs01062258\_m1, TCL1A-Hs00951350\_m1, TLR5-Hs00152825\_m1, CCR2-Hs00356601\_m1, CCL2-Hs00234140\_m1, CCR5-Hs00152917\_m1, CCR7-Hs99999080\_m1). RNA was isolated from the whole blood as described above for microarray analysis or from protocol biopsies (W3, M3 and M12) using the RNeasy Fibrous Tissue Mini Kit (Qiagen, Hilden, Germany). RNA obtained from the whole blood (1–2  $\mu$ g) or protocol biopsies (2  $\mu$ g) was reverse transcribed using Superscript Reverse transcriptase II (Invitrogen) or QuantiTect Reverse Transcription Kit (Qiagen, Hilden, Germany), respectively. The synthesized cDNA was subjected to RT-PCR analysis. Quantitative RT-PCR was performed using inventoried or custom-made Taqman assays in the whole blood or custom-made TaqMan low density array (Applied Biosystems) to analyze 19 genes in the biopsies RNA. Real-time RT-qPCR data were quantified using the SDS 2.4 software package (Applied Biosystems) and relative gene expression values were determined using the comparative  $2^{-\Delta\Delta C_t}$  method of the Relative quantification (RQ) Manager Software v 1.2.1 (Applied Biosystems) with normalization to endogenous control (GAPDH-Hs99999905\_m1 and PGK1-Hs99999906\_m1) in the case of gene expression from biopsies and to HPRT1-Hs01003267\_m1 in the case of the whole blood gene expression. Probe PNOG was due to high number of missing values (37%) excluded from the analysis. All investigated mRNAs were measured in triplicates for each sample.

## Statistics

The comparisons of tacrolimus ( $n = 13$ ) and sirolimus arm ( $n = 7$ ) of the study were performed according to the intention to treat principle. Normality of the data was tested using Kolmogorov-Smirnov normality test. Two-tailed Mann-Whitney U test was used to compare medians between patient groups. Data are presented as means  $\pm$  SEM, or medians (interquartile ranges). Two-sided P values were considered as statistically significant when it was less than 0.05. The rejection (both acute and chronic rejections) and proteinuria (defined as proteinuria  $> 1$ g/day) free intervals were determined using Kaplan–Meier estimates and groups were compared using the log-rank test.

Statistical significance of gene expression differences, revealed by RT-qPCR, in particular time points and overall difference within the study period was evaluated by GLMM



(Generalized linear mixed model) model of SPSS that enables the analysis of variance when the same measurement is made several times on each subject and the target can have a non-normal distribution. The missing values were calculated as medians of particular gene expression for the same time points (the missing values represented maximally 10% of all measured values). Due to non-normal distribution of positively skewed data, we used gamma regression of the dependent variable. Statistical analyses were performed using SPSS v.20.0 (SPSS, Inc., Chicago, IL) and GraphPad InStat v. 3. 05 for Windows (GraphPad software, San Diego, CA).

## Results

### Patient and graft survival

One patient each from SIR-group and TAC-group died at M35 and M48 due to peritonitis/sepsis and myocardial infarction with functional graft, respectively. One patient in the sirolimus arm (SIR-group) lost the graft at M4. There were two additional graft losses at M46 due to chronic AMR (TAC-group) and at M56 due to IgA nephropathy recurrence (SIR-group) (Fig 2). Comparing both study groups with standard of care group (low risk primary graft transplant cohort treated with CNI-based triple immunosuppression regimen), TAC-group exhibited similar 60M graft survival (Fig 2) comparing to other groups.

### Safety data

One patient from each arm had transiently BKV DNAemia at M2 and M3, respectively, without any sequelae. There was no detectable CMV DNAemia while 1 patient from SIR-group developed short-term weakly positive EBV-PCR at M3. One patient in TAC-group developed cancer duplicity (breast cancer at M24, stomach adenocarcinoma at M56). Detailed list of complications is given in Table 2. SIR-group received higher cumulative steroid dose per patient as compared to TAC-group (3931.1 vs. 2164.5 mg/patient/year).

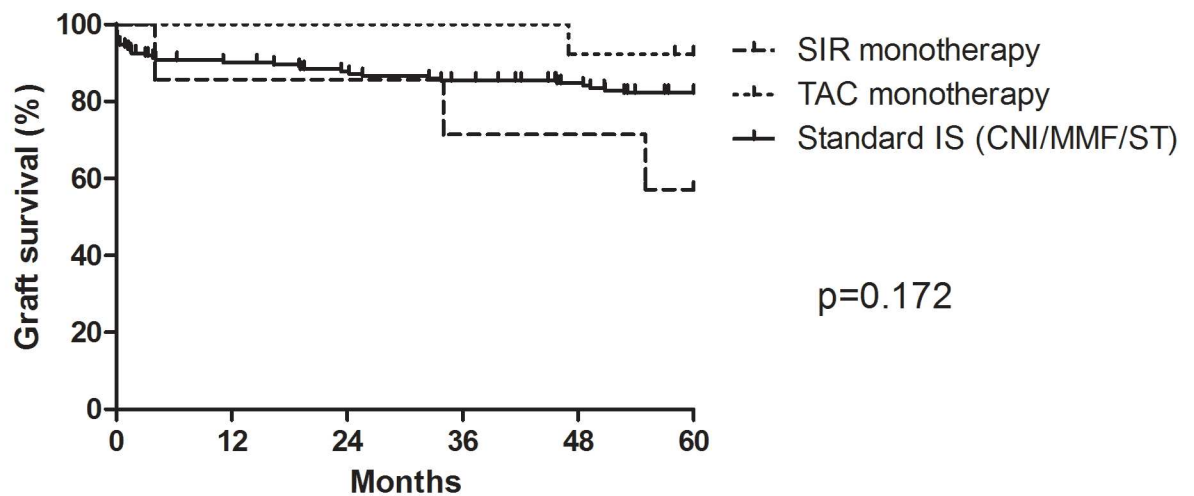

| Months | SIR monotherapy | TAC monotherapy | Standard IS (CNI/MMF/ST) |
|--------|-----------------|-----------------|--------------------------|
| 0      | 7               | 13              | 174                      |
| 12     | 6               | 13              | 155                      |
| 24     | 6               | 13              | 148                      |
| 36     | 5               | 13              | 144                      |
| 48     | 5               | 12              | 134                      |
| 60     | 4               | 12              | 125                      |

**Fig 2. Graft survival in study groups and standard of care group.** Patients received induction treatment with Alemtuzumab/Infliximab and long-term tacrolimus (TAC, n = 13) or sirolimus (SIR, n = 7) monotherapy. Standard of care group were patients with same inclusion criteria and from the same time period treated with CNI-based (tacrolimus or cyclosporine, mycophenolate mofetil and steroids) immunosuppression (control, n = 174). Log-rank test for comparison of all three groups (p = 0.172).

doi:10.1371/journal.pone.0169624.g002

**Table 2. Severe adverse effects within 12 and 60M of follow-up in SIR- and TAC groups.**

| Event, % (n)                              | 12 months follow-up |                   | 12–60 months follow-up |                   |
|-------------------------------------------|---------------------|-------------------|------------------------|-------------------|
|                                           | Tacrolimus (n = 13) | Sirolimus (n = 7) | Tacrolimus (n = 13)    | Sirolimus (n = 6) |
| <b>Infections</b>                         |                     |                   |                        |                   |
| Urinary tract infection                   | 46.2 (6)            | 42.9 (3)          | 23.1(3)                | 16.7 (1)          |
| Pneumonia                                 |                     | 14.3 (1)          | 7.7 (1)                |                   |
| Viral gastroenteritis                     | 7.7 (1)             |                   |                        |                   |
| Viral infection                           | 7.7 (1)             |                   |                        |                   |
| Pyelonephritis                            |                     |                   | 7.7 (1)                |                   |
| Peritonitis/septic shock                  |                     |                   |                        | 16.7 (1)          |
| BKV                                       | 7.7(1)              | 14.3 (1)          |                        |                   |
| <b>Cardio vascular disorders</b>          |                     |                   |                        |                   |
| Ischemic cardiac disease                  | 15.4 (2)            | 28.6 (2)          | 7.7 (1)                |                   |
| Stroke                                    | 7.7 (1)             |                   | 7.7 (1)                |                   |
| <b>Renal and urinary disorders</b>        |                     |                   |                        |                   |
| Delayed graft function                    | 15.4 (2)            | 14.3 (1)          |                        |                   |
| Hydrocele                                 |                     | 14.3 (1)          | 7.7 (1)                |                   |
| <b>Metabolism and nutrition disorders</b> |                     |                   |                        |                   |
| Diabetes mellitus                         | 15.4 (2)            | 57.1 (4)*         | 7.7 (1)                |                   |
| Hyperparathyreosis                        | 30.8 (4)            | 28.6 (2)          | 7.7 (1)                | 33.3 (2)          |
| <b>Blood and lymphocyte disorders</b>     |                     |                   |                        |                   |
| Leucopenia                                | 69.2 (9)            | 85.7 (6)          |                        |                   |
| <b>Cancer</b>                             |                     |                   |                        |                   |
| Breast                                    |                     |                   | 7.7 (1)                |                   |
| Stomach                                   |                     |                   | 7.7 (1)                |                   |

\* one patient with preexisting diabetes

doi:10.1371/journal.pone.0169624.t002

### Renal function and proteinuria

Mild proteinuria occurred in two patients from TAC-group at the 3<sup>rd</sup> year. Contrary, 5/6 sirolimus patients (3 of them within 6M) developed severe proteinuria (Fig 3). After conversion to tacrolimus/MMF therapy the proteinuria significantly decreased in 4/5 patients. The TAC-group showed excellent serum creatinine levels (115.2 +/-51.7 and 127.3 +/-54.5µmol/L at M12 and 60, respectively). There were no significant differences in kidney graft function among groups (The comparison of mean serum creatinine levels of TAC- and SIR- groups with patients with standard of care immunosuppression (CNI/MMF/ST) is given in Supplementary S1 Fig). Trough levels of tacrolimus and sirolimus in individual patients are given in S2 Table.

### Rejections and histology

Taken into account any type of biopsy-proven rejection (humoral, cellular, mixed), both with (case biopsy) or without clinical signs (protocol biopsy), we observed within M60 follow-up 8 rejection episodes; in 6/7 sirolimus and 2/13 tacrolimus patients (Fig 3). Detailed histologic findings of all patients are given in S3 Table.

### Immune monitoring

**Peripheral leucocyte counts.** Lymphodepletion after Alemtuzumab induction was deep and lasted until the end of the first year as monitored in blood using flow cytometry.

Interestingly, there was a tendency towards faster B cell repopulation in TAC-group as compared with sirolimus one ( $p = 0.09$ ) (Fig 4).

**Donor-reactive memory/effector T cells.** Pre-transplant donor-reactive memory/effector T cell levels were detected above the cut-off for low/high responder [9] of 20 spots/300,000 PBMC in 5/11 and 2/6 patients analyzed by Elispot in the TAC- and SIR-group, respectively; four of them even at high-risk levels ( $\geq 200$  spots/300,000) (S3 Table, Fig 5). All five T-cell pre-sensitized patients of the TAC-group could be kept on monotherapy for the M60 follow-up period with excellent graft function. However, two of them showed histological signs of chronic AMR in M12 and M36 biopsy, respectively. In contrast, both high-responder patients of the SIR-group had to be switched to standard therapy within first year because of proteinuria and signs of chronic TCMR and AMR at M12 and M36 biopsy, respectively.

**Urinary IP-10 revealed intra-graft immune silence in tacrolimus monotherapy group.** The urinary IP-10 (CXCL10) levels were monitored until M3 as indicator of tubular endothelial cell injury [35] and intra-graft inflammation [29]. Remarkably, after normalization of IP-10 levels within the first week post-Tx, it kept at low level ( $< 200$  pg/ml) at M3 in 10/12 of all tacrolimus monotherapy patients, one each developed borderline or significantly enhanced levels (S3 Table). By contrast, 4/7 sirolimus patients developed strongly enhanced levels ( $p < 0.05$ , Fisher-Yates test). The patient with peak levels of  $> 10,000$  pg/ml at M1 in SIR-group showed chronic TCMR within M12. Interestingly, its pre-Tx Elispot level was also highest by  $> 1,000$  spots/300,000 PBMC. The other three patients with enhanced IP-10 levels in SIR-group developed severe proteinuria.

**Donor-specific antibodies.** At M36, donor specific antibodies (DSA) were analyzed in 17 patients. Long-term post-transplant presence of DSA was found in 3 out of 17 serum samples (range 1,000–2,000 MFI). Two of them (one each group) developed late chronic AMR and the third one (TAC-group) had excellent graft function and histology.

## Gene expression analysis revealed significant differences between the study groups

The RISE 2.0 custom microarray with 5,069 different probes, designed especially for transplantation research, was used to analyze the peripheral blood gene expression.

**a) Early changes (W3): altered lineage composition as result of induction protocol and differential reconstitution between the groups.** At first, pre-Tx and W3 samples were compared to evaluate the influence of the initial immunosuppressive treatment.

The 441 reporters differentially expressed between pre-Tx and W3 samples with an at least three-fold differential expression (S4 and S5 Tables) were subjected to an annotation enrichment analysis (S6 Table). As expected, markers related to T/B/NK cell lineages dominated the top-ranked differentially expressed genes, dropping from pre-Tx to W3 up to almost 500-fold. Interestingly, the IL-7 receptor, CCR7, and TCL1A genes that are strongly expressed on naïve lymphocytes, belonged to the top genes down-regulated by factor 492-, 189-, and 62-fold, respectively, suggesting a preferential reduction of naïve compared to the memory/effector compartment).

At W3, after only one week of treatment allocation, 93 reporters were found to be upregulated and 151 downregulated in the comparison of TAC- vs. SIR -group (S7 and S8 Tables). Remarkably, the TAC -group revealed enhanced expression of B-cell related genes (*TCL1A*, *BLK*) and downregulation of inflammation related genes (*IL-8*, *MMP-8*) and dysregulation of those genes continued up to M12 (S9 and S10 Tables).

**b) Patients on TAC-monotherapy had a tolerance-like signature.** Then the samples taken at M2, M3, M6, and M12 were compared between the two study arms. The  $> 1.5$ -fold

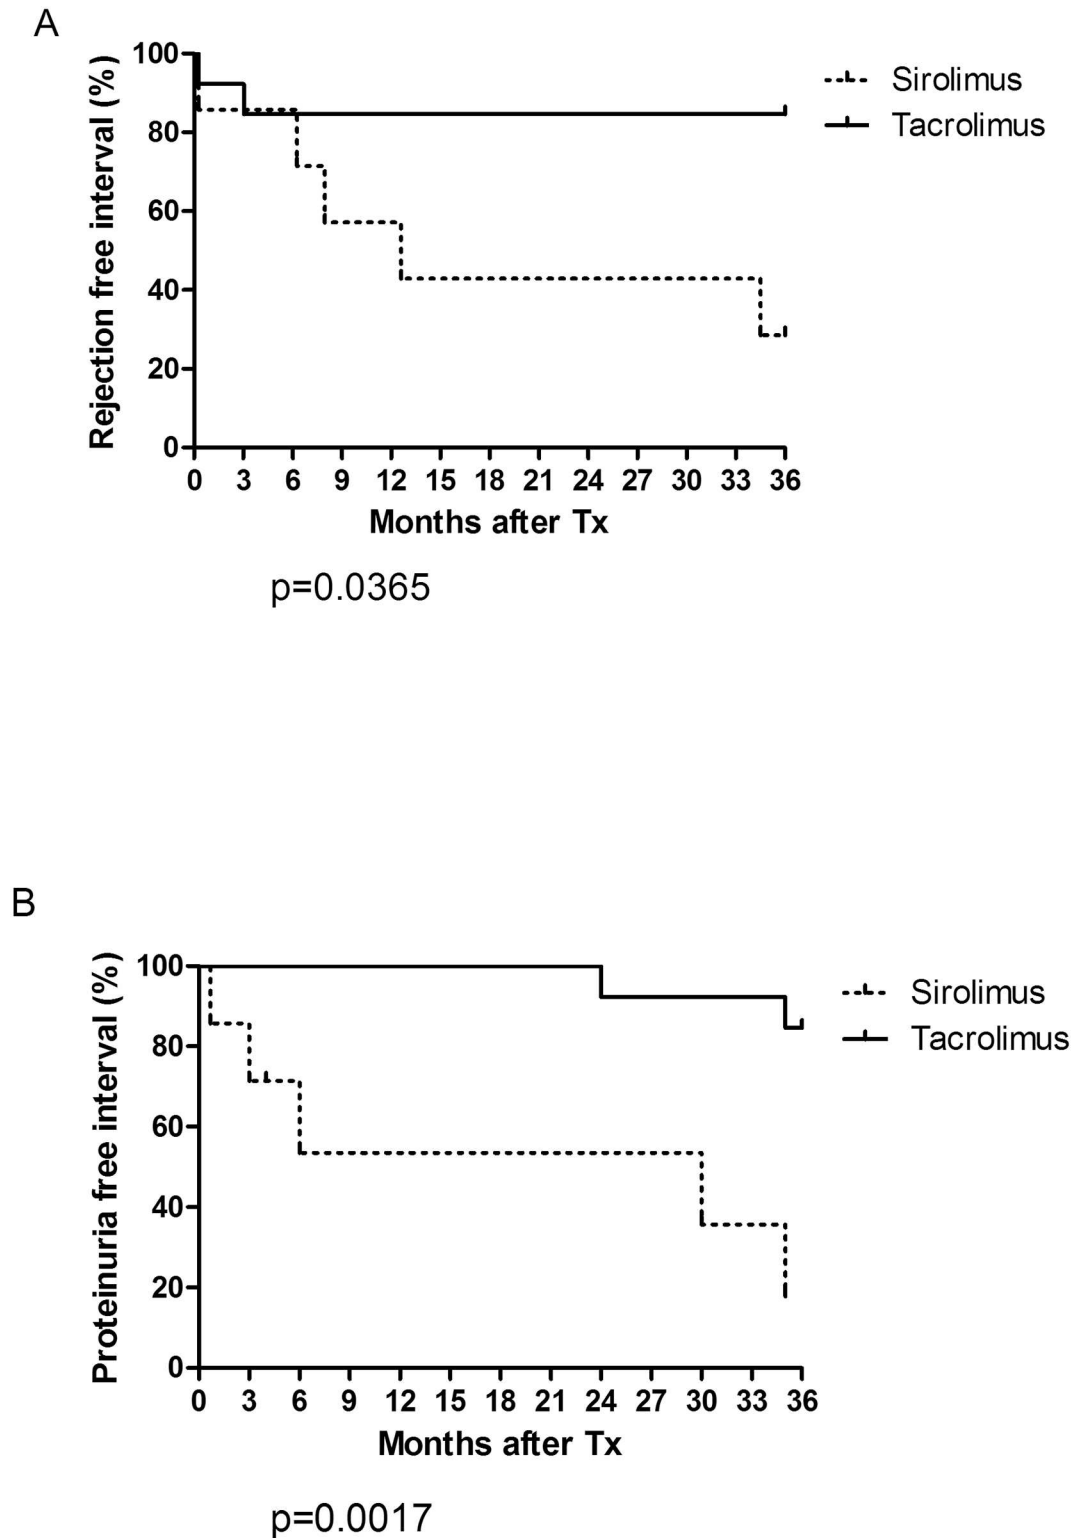

**Fig 3. Rejection-free interval (A), defined as the interval between the time of transplantation and the first biopsy proven allograft rejection event (acute T-cell mediated rejection or acute/chronic humoral rejection) and proteinuria-free interval (B), as the interval between the time of transplantation and the first observed proteinuria >1g/24 hours shown in days by treatment group. P values were determined by log-rank analysis.**

doi:10.1371/journal.pone.0169624.g003

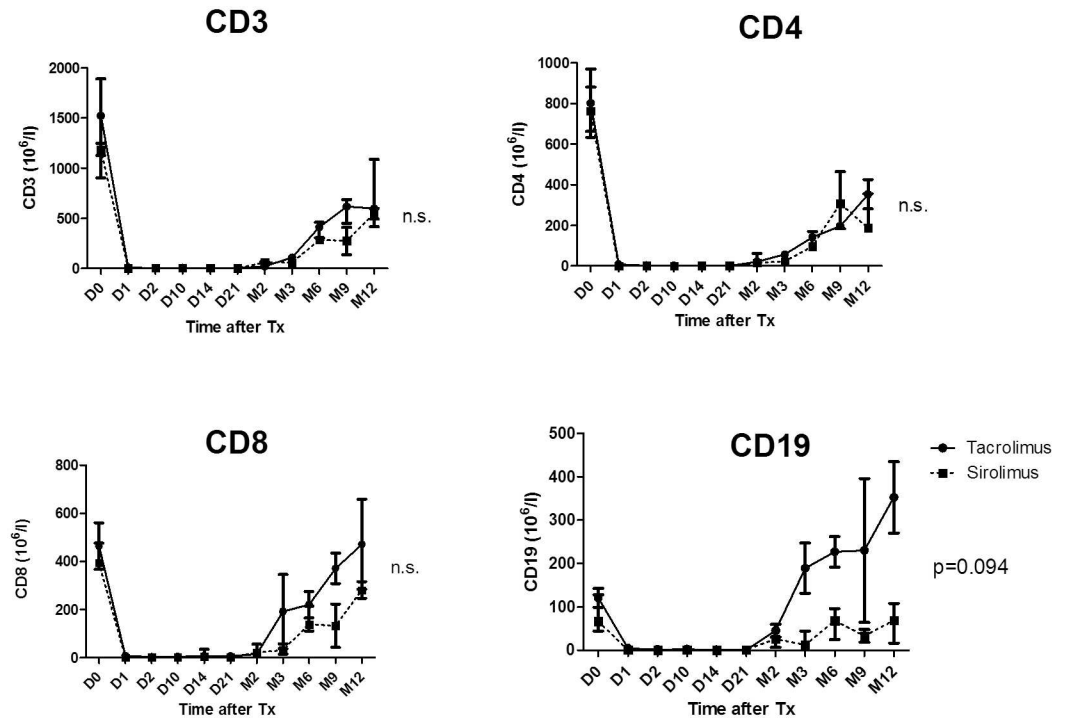

**Fig 4. The effect of an initial aggressive immunosuppression (Alemtuzumab, anti-CD 52 therapeutical antibody targeting mature lymphocytes; Infliximab, anti-TNF-therapeutical antibody targeting T-lymphocytes and Methylprednisolone, shortly before and after Tx, followed by two weeks of Tacrolimus treatment) on T and B cells depletion and their subsequent recovery within 12 months in TAC- and SIR-group. CD3<sup>+</sup> for T cells, CD4<sup>+</sup> for TH lymphocytes, CD8<sup>+</sup> for cytotoxic lymphocytes and CD19<sup>+</sup> for B cells. Data are presented as means and SEM.**

doi:10.1371/journal.pone.0169624.g004

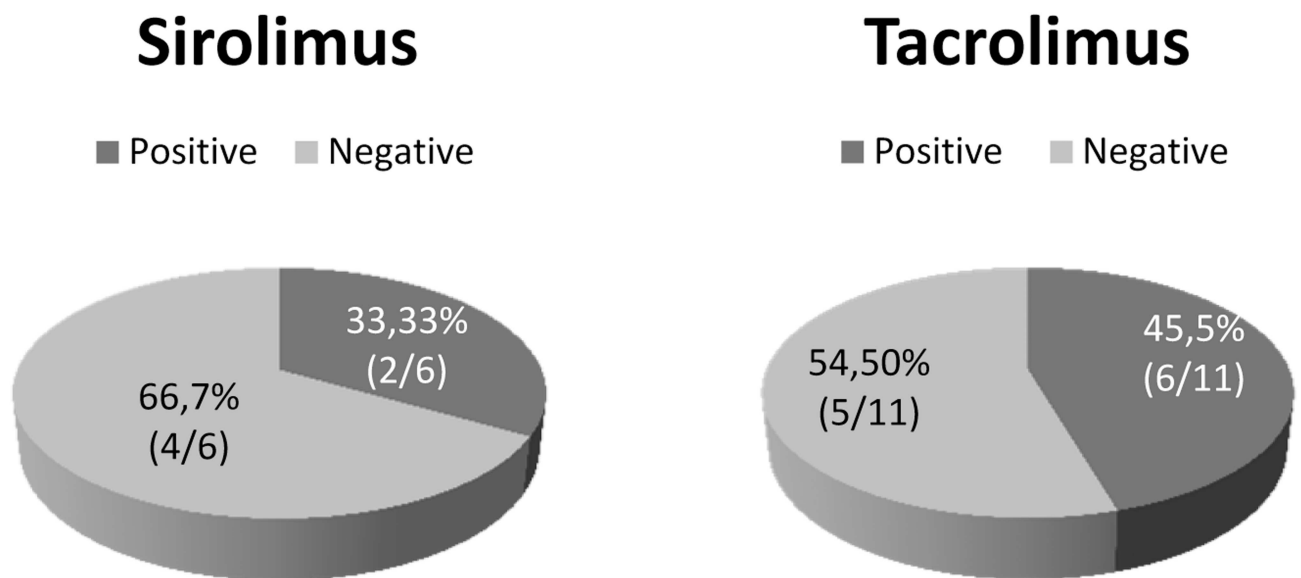

**Fig 5. Distribution of patients in SIR and TAC groups depending on the pretransplant donor specific T-cell alloimmune response assessed by IFN- $\gamma$  Elispot. Negative group: <20 spots/ 300 000 PBMC; positive group: >20 spots/ 300 000 PBMC.**

doi:10.1371/journal.pone.0169624.g005

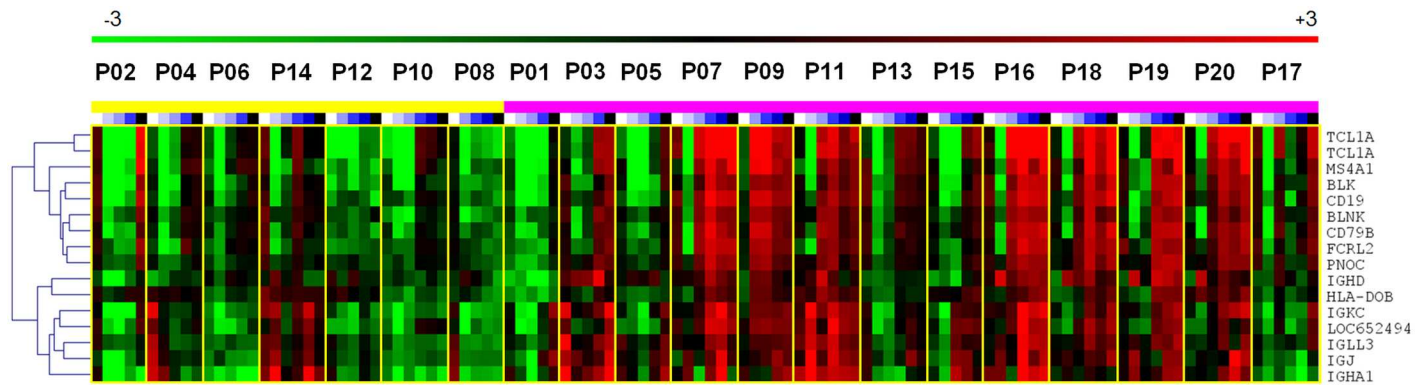

**Fig 6. Heat map of B-cell specific genes differentially expressed between TAC (violet) and SIR-group (yellow) with stronger expression in TAC samples.**

doi:10.1371/journal.pone.0169624.g006

differentially expressed genes found (S9 and 10 Tables) were subjected to an annotation enrichment analysis.

Most interestingly, the top genes highly expressed in the TAC-group belong to B cell (*CD79A*, *BLK*, *FCRL2*, *TCL1A*) and Ig-related categories (*IGHM*, *IGLC*, *IGKC*, *IGHG1*, *CD200*) (Fig 6, Table 3). The pattern is similar to the recently published signature in operational tolerant patients [31, 36–38]. This might indicate a faster regeneration of B cells in the TAC-group after the initial cell depletion.

Another interesting group of genes up-regulated in the TAC-group was described to be overexpressed on monocytes following IL-10 treatment [39] suggesting the occurrence of regulatory monocytes in this group (S11 Table).

Among the top genes up-regulated in the SIR-group were genes involved in inflammation *FN1* (fibronectin 1), *IL-8* (interleukin 8), *MMP-8* (matrix metalloproteinase 8), *TNNT1* (tropomyosin T type 1), *C4A/C4B* (complement component 4A / 4B), and *TGM2* (tissue transglutaminase) (S10 Table).

**c) The special molecular signature of the TAC-group revealed by microarray could be validated by qRT-PCR in blood samples.** Differential gene expressions revealed by microarray, were validated by qRT-PCR of 19 genes in blood samples. These genes were selected as highly up-regulated (*TCL1A*, *CD79A*, *CD200*, *MS4A1*, *FCRL2*, *HS3ST1* and *CCR7*) or down-regulated (*FN-1*, *IL-8*, *C4A*) in the TAC-group. *CD247*, *CCR2*, and *CCL2* were up-regulated in patients with graft rejection and proteinuria. *CCR5* and *FCRL1* genes were chosen as counterparts for *CCR2* and *FCRL2*, respectively. In addition, we analyzed gene expression of recently described tolerance associated markers (*IRF5*, *TLR5*, *SLC8A1*, *SH2D1B* [31]).

In fact, qRT-PCR confirmed the statistically significant higher expression of B-cell related genes (*CD79B*, *FCRL1*, *FCRL2*, *MS4A1*, *TCL1A*), cytokine receptors *CCR5* and *CCR7*, *CD200*, the transcription factor *IRF5*, the toll-like receptor *TLR5*, *HS3ST1* (heparan sulfate 3-O-sulfotransferase 1), and *SH2D1B*, a gene playing a role in signal transduction of antigen-presenting cells in the TAC-group (Fig 7). Additionally, the relative up-regulation of *FN1*, a gene involved in fibrosis, was validated in the SIR-group.

Finally, the flow cytometric data confirm the faster B-cell recovery in TAC-group (Fig 4).

**e) Lower intra-graft expression of inflammation related genes confirm immune silence.** The transcripts patterns from peripheral blood were further evaluated in protocol biopsies. Statistically significant differences in intrarenal gene expression were verified for down-regulation of *C4A/C4B* (part of complement cascade, mediator of inflammation) in the

**Table 3. List of B cell associated genes found to be differentially expressed within the particular group comparison.** Annotation data are from <http://www.uniprot.org/> and <http://www.genecards.org/>. In Tacrolimus/Sirolimus comparison fold change was calculated from gene expression medians of all measured time-points in particular groups. In rejecting and non-rejecting patients only samples collected at later time points (M2, M3, M6 and M12) were used to calculate medians of gene expression.

| Name                 | Median fold change |                |             | Description                                        | Relevant features                                                                                                                                                                                                                                                                                             |
|----------------------|--------------------|----------------|-------------|----------------------------------------------------|---------------------------------------------------------------------------------------------------------------------------------------------------------------------------------------------------------------------------------------------------------------------------------------------------------------|
|                      | Tac x Sir          | Rej x non-rej. | Pre-Tx x W3 |                                                    |                                                                                                                                                                                                                                                                                                               |
| TCL1A                | 13.8               | -4.8           | 62.9        | T-cell leukemia/lymphoma 1A                        | Involved in B cell receptor pathway. Expressed in naive B cells more than in memory B cells. Overexpression of TCL1A prolongs naive B cell survival.                                                                                                                                                          |
| IGHM                 | 7.9                | -4.8           | 9.29        | immunoglobulin heavy constant mu                   | Encodes the C region of the mu heavy chain of the IgM isotype. Expressed by naive B cells.                                                                                                                                                                                                                    |
| CD79A                | 6.6                | -4.7           | 22.57       | CD79a molecule, immunoglobulin-associated alpha    | Required in cooperation with CD79B for initiation of the signal transduction cascade activated by binding of of antigen to the B-cell antigen receptor complex (BCR) which leads to antigen presentation. Also required for BCR surface expression and for efficient differentiation of pro- and pre-B-cells. |
| IGLC                 | 6.2                | -5.3           | 1.52        | immunoglobulin lambda constant group               | Encodes the Ig domain.                                                                                                                                                                                                                                                                                        |
| CD200                | 6.2                | -6.3           | 3.21        | CD200 molecule                                     | Encodes the Ig domain.                                                                                                                                                                                                                                                                                        |
| IGHG1IGHG2IGHG3IGHG4 | 5.8                | -3.3           | 1.06        | immunoglobulin heavy constant gamma 1              | Encodes the Ig domain.                                                                                                                                                                                                                                                                                        |
| IGKC                 | 5.6                | -3.9           | 2.67        | immunoglobulin kappa constant                      | Encodes the Ig domain.                                                                                                                                                                                                                                                                                        |
| BLK                  | 5.3                | -3.7           | 10.98       | B lymphoid tyrosine kinase                         | Encodes a nonreceptor tyrosine-kinase involved in B-cell receptor signaling.                                                                                                                                                                                                                                  |
| FCRL2                | 5.2                | -3.1           | 3.33        | Fc receptor-like 2                                 | Membrane protein belonging to FCRL family, expressed preferentially by memory B cells.                                                                                                                                                                                                                        |
| IGHA1                | 5.2                | -4.3           | 1.28        | immunoglobulin heavy constant alpha 1              | Ig domain.                                                                                                                                                                                                                                                                                                    |
| MS4A1                | 4.9                | -5.0           | 15.9        | membrane-spanning 4-domains, subfamily A, member 1 | B-lymphocyte specific, cell-surface molecule involved in B cell activation and differentiation.                                                                                                                                                                                                               |
| CD19                 | 3.4                | -3.9           | 4.27        | CD19 molecule                                      | Assembles with the antigen receptor of B-lymphocytes in order to decrease the threshold for antigen receptor-dependent stimulation.                                                                                                                                                                           |

doi:10.1371/journal.pone.0169624.t003

TAC-group (Fig 7). Moreover, non-rejecting grafts (mostly TAC-group) showed down-regulation of *CD274* (*PD1-L*) and *TLR5* (activated macrophages) compared to grafts with rejection within 12M (Fig 8).

## Discussion

Based on recent biomarker studies that revealed a key role of donor-specific Teff in relation to poor allograft outcome and need for high-dose multiple-drug immunosuppression [7–9], we designed a novel induction protocol that sequentially targets CD52 to reduce (alloreactive) clonal size and TNF to inhibit/destroy tmTNF-expressing donor-specific Teff recently (re)activated by the allograft. The PoC-trial confirms our hypothesis that this protocol might be a promising novel option to achieve safe monotherapy in almost all kidney transplant patients as early as post-d2, even in those with enhanced levels of pre-transplant T-cell sensitization. The excellent graft survival and function during 5yr follow-up in the TAC-group were associated with a particular biomarker profile: i) B-cell signature reported to be associated with operational tolerance [31, 36, 40], ii) almost no signs of inflammation in the graft and the blood, iii) some up-regulation of regulatory genes, and iv) control of humoral alloresponse in almost all

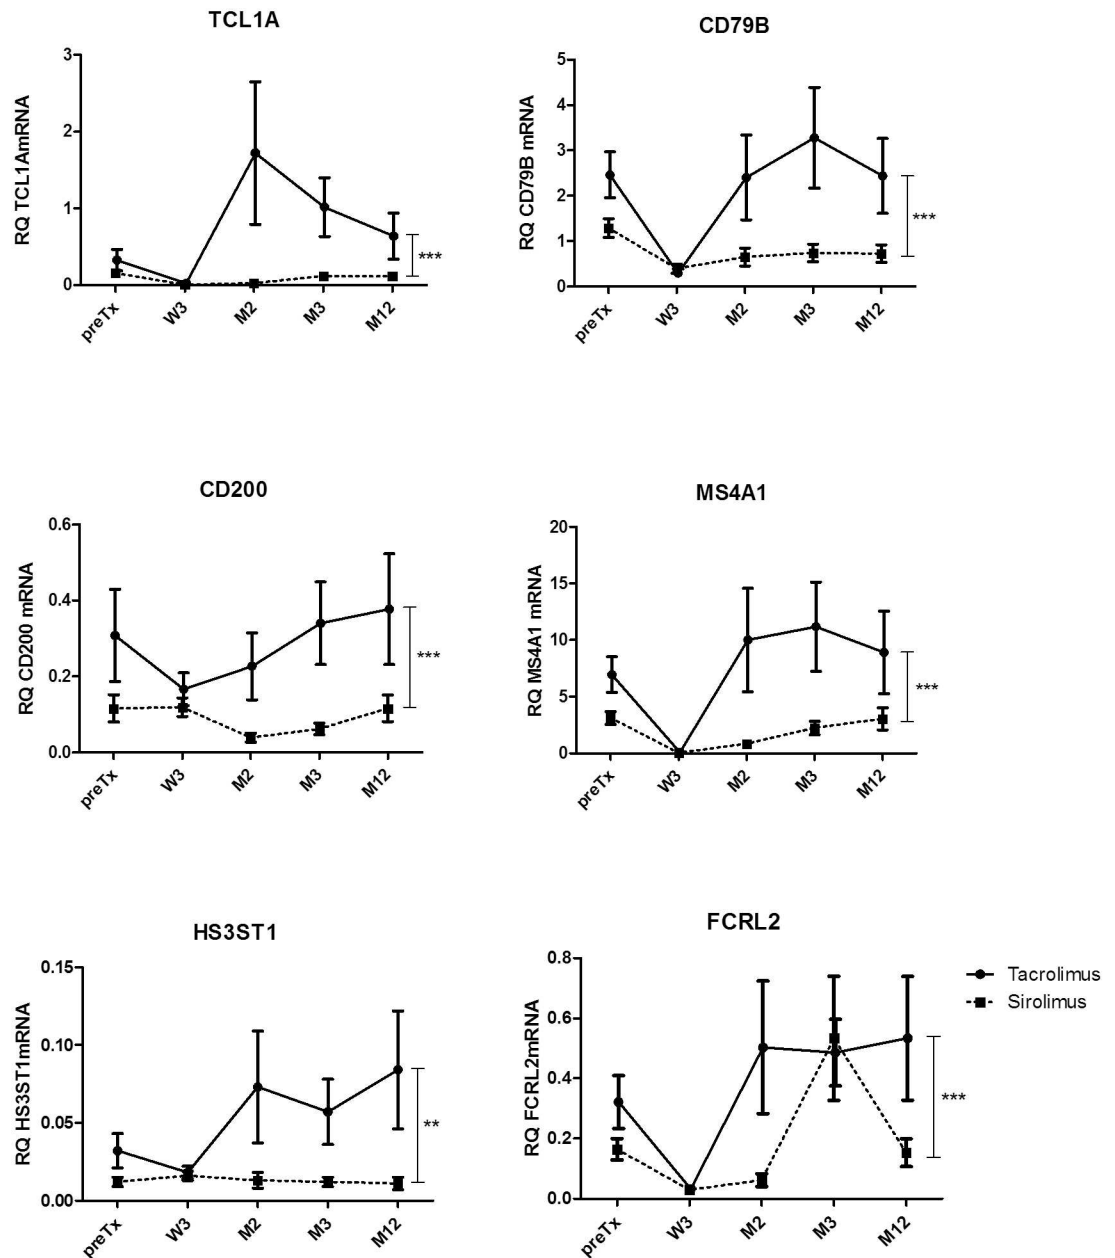

**Fig 7. Validation of microarray analysis by qRT-PCR of blood samples. The comparison of TAC- and SIR-group of patients.** All data are presented as mean±SEM. Statistically significant difference in gene expression within the whole study period was calculated by GLM mixed model. \*\* p<0.05, \*\*\* p<0.001.

doi:10.1371/journal.pone.0169624.g007

patients. These data suggest that the short-term and sequential induction protocol followed by low/intermediate-dose tacrolimus monotherapy not only controls undesired donor-reactive alloresponsive T/B-cells but might also supports some regulation (Suppl. Tab. 3) allowing long-term minimized immunosuppression. Thus this protocol was also successful in most of the patients with enhanced T-cell presensitization that have commonly poorer outcome even under standard triple-drug immunosuppression.

Despite the very promising data in the TAC-group, the poor outcome of the SIR-group was very surprising. This study was originally planned to prove the superiority of SIR-



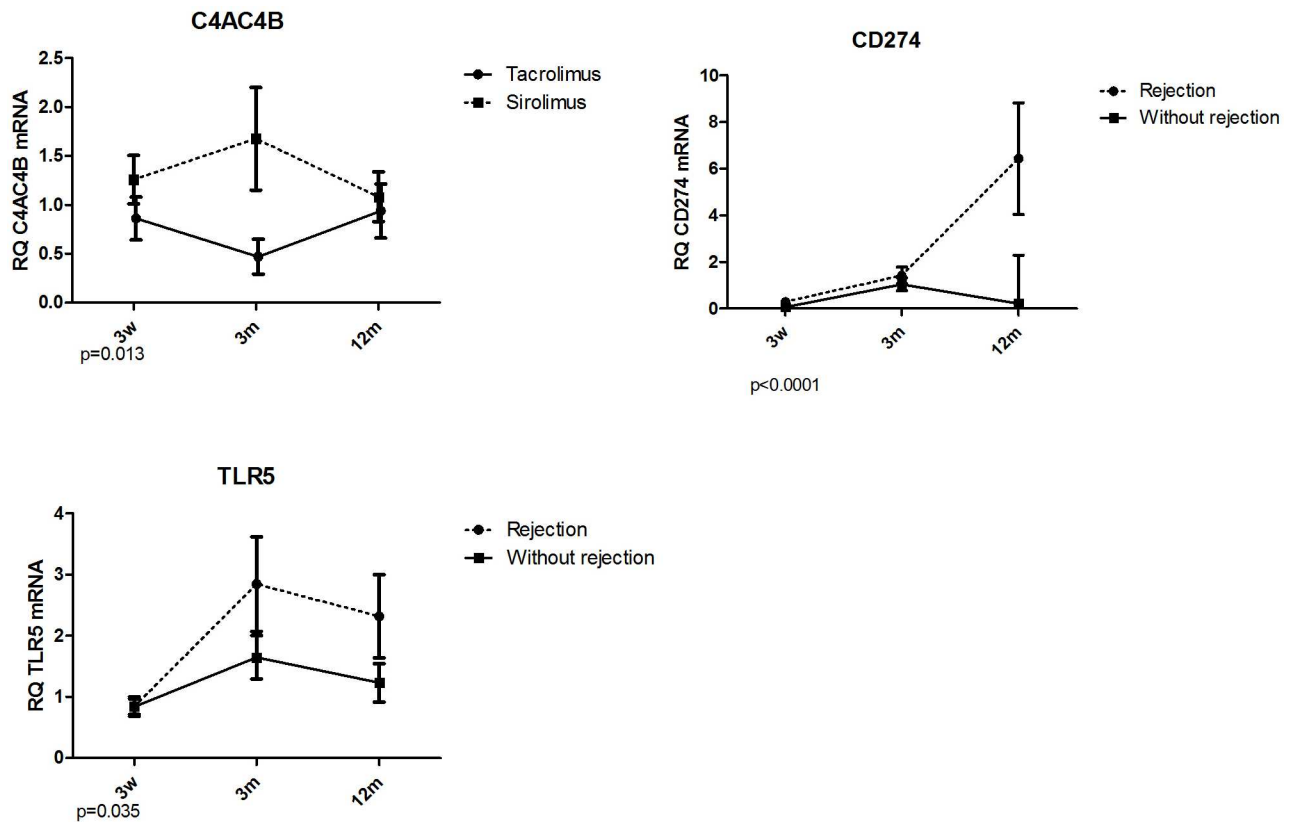

**Fig 8. Validation of microarray analysis of blood samples by qRT-PCR of graft biopsies.** The comparison of TAC- and SIR- group of patients and of patients with /without rejection event within 12 months posttransplant. All data are presented as mean±SEM. P values shown under the graphs indicate statistically significant difference in gene expression calculated by GLM mixed model.

doi:10.1371/journal.pone.0169624.g008

monotherapy after dual induction therapy, alemtuzumab and infliximab, as an insufficient targeting of donor-reactive Teff has been discussed as reason for the high AMR rate reported in patients who received SIR-monotherapy after alemtuzumab induction [41]. Moreover, it was suggested that SIR support regulatory T cells [16]. However more late acute and chronic rejections occurred in SIR-group during the first 12 months of therapy. Frequent rejection and proteinuria were reasons to stop enrollment into this arm after first 7 patients. During the follow-up all patients of SIR-group were converted to standard immunosuppression because of abnormal histology along with side effects. It is known that sirolimus is less effective than calcineurin inhibitors (CNI) when given de-novo after kidney transplantation [42]. Similarly, other studies have shown higher rejection rate and poorer graft outcome if CNI-free regimen was used [43] despite better renal function in patients who continued with CNI-free immunosuppression. However, it is not clear why sirolimus monotherapy in our double-induction protocol looks worse compared to the combination with alemtuzumab alone as reported elsewhere [12, 28]. Here we could better control AMR but less good TCMR and proteinuria. We cannot rule out that particularly the latter might be related to the combination of targeting TNF and mTOR.

Most interestingly, the biomarker studies confirm the superiority of the TAC-group vs. the SIR-group at all parameters. The differences at the biomarker signatures were seen already long before the clinical picture of rejection and/or proteinuria in the SIR-group was visible. There is still the textbook statement in the air that CNI prevent tolerance induction. This is

based on biased preclinical studies using non-physiologically high CNI blood level. Recently low-dose CNI was shown to support tolerance in a rat kidney transplant model [44]. Moreover, all three tolerance induction protocols (Boston, Stanford, Chicago) related to chimerism with donor hematopoietic stem cells use CNI for > 6 months to stabilize tolerance induction phase [10, 45, 46] and similarly kidney transplant patients who are free of rejection under CNI standard therapy exhibited a particular molecular signature [37]. Remarkably, our stable patients in the TAC-group developed a comparable signature.

As expected, alemtuzumab induction was initially associated with profound downregulation of many immune-related genes, however, as early as at W3 (one week after stratification into the two groups) differences between both treatment arms had become obvious. Especially B cell-related transcripts were significantly spared in TAC-group. It was shown that after initial B-cell depletion caused by alemtuzumab, peripheral B cells repopulate from W6 and after M6 even exceeded base line levels and result in long-term shift toward naïve/transitory B cells that have been associated with operational tolerance [47]. In this study we clearly showed, that this observation is true in tacrolimus treated patients while not in sirolimus patients. Similarly, our group [37] and later Heidt et al [48] have shown that expression levels of B-cell related markers *TCL1A*, *CD79B* and *MS4A1* were increased in stable and rejection-free patients but decreased at the time of acute rejection, respectively. Similarly, intrarenal B-cell signatures were observed in grafts with better control of acute rejection [49].

There are also some limitations of this study. Although the study was originally planned as open label randomized trial, due to methodological limitations in randomization, small sample size, and lack of power to assess the primary endpoint, it is scientifically correct to present our data as prospective observational trial. The failure to allocate last 7 patients to sirolimus treatment was only ethical one. Also-DSA monitoring clearly lacks pretransplant values as sera were not available.

Sirolimus inferiority was obvious and in line with others [42] and thus confirmatory larger prospective trial is not advocated. Contrary, the concept of tacrolimus monotherapy after profound depletive regimen should be further validated in a randomized multicenter trial as recently prepared by the BioDrim consortium.

In summary, our sequential double induction protocol followed by tacrolimus monotherapy showed very promising 5yr-outcome, even in T-cell presensitized patients in regards of particular biomarker profile of specific B-cell signature, other regulatory and tolerance-associated genes and inhibition of inflammation-related genes.

## Supporting Information

**S1 Data. Log files for analysis of gene expression data using GLMM model of SPSS.**  
(DOCX)

**S1 Fig. Mean serum creatinine levels in study groups and standard of care group.** Patients received induction treatment with Alemtuzumab followed by Infliximab and tacrolimus (TAC, n = 13) or sirolimus (SIR, n = 7) monotherapy. Standard of care group were patients with same inclusion criteria and from the same time period treated with CNI-based (tacrolimus or cyclosporine, mycophenolate mofetil and steroids) immunosuppression (control, n = 174).  
(TIF)

**S1 File. Consort 2010 Checklist.**  
(DOC)

**S2 File. IRB study protocol.**

(PDF)

**S1 Table. Change in immunosuppressive protocol within 60M follow up and comparison of graft function of kidney transplant recipients in TAC- and SIR-group evaluated by serum creatinine level.**

(DOCX)

**S2 Table. Tacrolimus and Sirolimus trough levels in individual patients during follow-up.**

(DOCX)

**S3 Table. Demographic and clinical variables in each of patients included in the study.**

(DOCX)

**S4 Table. List of genes significantly up-regulated in pre-Tx samples compared to samples at 3 weeks after Tx.** Complete list of 262 probes ranked according to median fold change (only fold changes  $\geq 3$  were included) with corresponding p values (two-tailed t test) and microarray probe ID.

(DOCX)

**S5 Table. List of genes significantly down-regulated in pre-Tx samples compared to samples at 3 weeks after Tx.** Complete list of 179 probes ranked according to median fold change (only fold changes  $\geq 3$  were included) with corresponding p values (two-tailed t test) and microarray probe ID.

(DOCX)

**S6 Table. Annotation enrichment of genes with significantly higher differential expression in pre-Tx samples compared with samples collected three weeks after Tx.** Only the first 15 annotations with the highest statistical significance are shown.

(DOCX)

**S7 Table. List of genes significantly up-regulated in W3 samples of patients from Tacrolimus group compared to patients from Sirolimus group.** Complete list of 93 probes ranked according to median fold change (only fold changes  $\geq 1.5$  were included) with corresponding p values (two-tailed t test) and microarray probe ID.

(DOCX)

**S8 Table. List of genes significantly down-regulated in W3 samples of patients from Tacrolimus group compared to patients from Sirolimus group.** Complete list of 151 probes ranked according to median fold change (only fold changes  $\geq 1.5$  were included) with corresponding p values (two-tailed t test) and microarray probe ID.

(DOCX)

**S9 Table. List of genes significantly up-regulated in M2-M12 samples of patients from tacrolimus group compared to patients from Sirolimus group.** Complete list of 134 probes ranked according to median fold change (only fold changes  $\geq 1.5$  were included) with corresponding p values (two-tailed t test) and microarray probe ID.

(DOCX)

**S10 Table. List of genes significantly down-regulated in M2-M12 samples of patients from tacrolimus group compared to patients from Sirolimus group.** Complete list of 136 probes ranked according to median fold change (only fold changes  $\geq 1.5$  were included) with corresponding p values (two-tailed t test) and microarray probe ID.

(DOCX)

**S11 Table. Annotation enrichment analysis of genes with significantly higher differential expression in M2-M12 samples of patients treated with Tacrolimus relative to the Sirolimus group.** Only the first 15 annotations with the highest statistical significance are shown. (DOCX)

## Acknowledgments

This work was supported by RISE (EU FP6 program) under grant agreement no. 512090 and Bio-DrIM (EU FP7 program). O.V. is the recipient of grants from the Internal Grant Agency of the Ministry of Health of the Czech Republic NT14102-3/2013 and AZV ČR 15-26865A and MH CZ DRO (“Institute for Clinical and Experimental Medicine—IKEM, IN 00023001”). The authors are indebted to Marie Kolarova, Edita Houbova and Romana Polackova for their technical assistance and coordination of the sample collection as well as to patients and nurses for their cooperation and help.

## Author Contributions

**Conceptualization:** OV H-DV PR.

**Formal analysis:** PH ST SS BG BS IT UJ.

**Funding acquisition:** OV H-DV PR.

**Investigation:** OV PH ST SS BG BS P. Miqueu P. Mrazova IT ES EH UJ.

**Methodology:** OV ST SS BG BS H-DV PR.

**Supervision:** OV H-DV PR.

**Visualization:** PH ST SS BG BS IT UJ.

**Writing – original draft:** OV PH ST BS H-DV PR.

**Writing – review & editing:** OV PH ST H-DV PR.

## References

1. Jardine AG, Gaston RS, Fellstrom BC, Holdaas H. Prevention of cardiovascular disease in adult recipients of kidney transplants. *Lancet*. 2011; 378:1419–27. doi: [10.1016/S0140-6736\(11\)61334-2](https://doi.org/10.1016/S0140-6736(11)61334-2) PMID: [22000138](https://pubmed.ncbi.nlm.nih.gov/22000138/)
2. Cunningham J, Locatelli F, Rodriguez M. Secondary hyperparathyroidism: pathogenesis, disease progression, and therapeutic options. *Clin J Am Soc Nephrol*. 2011; 6:913–21. doi: [10.2215/CJN.06040710](https://doi.org/10.2215/CJN.06040710) PMID: [21454719](https://pubmed.ncbi.nlm.nih.gov/21454719/)
3. Tan HP, Donaldson J, Basu A, Unruh M, Randhawa P, Sharma V, et al. Two hundred living donor kidney transplantations under alemtuzumab induction and tacrolimus monotherapy: 3-year follow-up. *Am J Transplant*. 2009; 9:355–66. doi: [10.1111/j.1600-6143.2008.02492.x](https://doi.org/10.1111/j.1600-6143.2008.02492.x) PMID: [19120078](https://pubmed.ncbi.nlm.nih.gov/19120078/)
4. Bestard O, Crespo E, Stein M, Lucia M, Roelen DL, de Vaal YJ, et al. Cross-validation of IFN-gamma Elispot assay for measuring alloreactive memory/effector T cell responses in renal transplant recipients. *Am J Transplant*. 2013; 13:1880–90. doi: [10.1111/ajt.12285](https://doi.org/10.1111/ajt.12285) PMID: [23763435](https://pubmed.ncbi.nlm.nih.gov/23763435/)
5. Bohne F, Martinez-Llordella M, Lozano JJ, Miquel R, Benitez C, Londono MC, et al. Intra-graft expression of genes involved in iron homeostasis predicts the development of operational tolerance in human liver transplantation. *J Clin Invest*. 2012; 122:368–82. doi: [10.1172/JCI59411](https://doi.org/10.1172/JCI59411) PMID: [22156196](https://pubmed.ncbi.nlm.nih.gov/22156196/)
6. Augustine JJ, Siu DS, Clemente MJ, Schulak JA, Heeger PS, Hricik DE. Pre-transplant IFN-gamma ELISPOTs are associated with post-transplant renal function in African American renal transplant recipients. *Am J Transplant*. 2005; 5:1971–5. doi: [10.1111/j.1600-6143.2005.00958.x](https://doi.org/10.1111/j.1600-6143.2005.00958.x) PMID: [15996247](https://pubmed.ncbi.nlm.nih.gov/15996247/)
7. Nickel P, Presber F, Bold G, Biti D, Schonemann C, Tullius SG, et al. Enzyme-linked immunosorbent spot assay for donor-reactive interferon-gamma-producing cells identifies T-cell presensitization and

correlates with graft function at 6 and 12 months in renal-transplant recipients. *Transplantation*. 2004; 78:1640–6. PMID: [15591953](#)

8. Ashoor I, Najafian N, Korin Y, Reed EF, Mohanakumar T, Ikle D, et al. Standardization and cross validation of alloreactive IFN $\gamma$  ELISPOT assays within the clinical trials in organ transplantation consortium. *Am J Transplant*. 2013; 13:1871–9. doi: [10.1111/ajt.12286](#) PMID: [23710568](#)
9. Bestard O, Cruzado JM, Lucia M, Crespo E, Casis L, Sawitzki B, et al. Prospective assessment of anti-donor cellular alloreactivity is a tool for guidance of immunosuppression in kidney transplantation. *Kidney Int*. 2013; 84:1226–36. doi: [10.1038/ki.2013.236](#) PMID: [23783240](#)
10. Kawai T, Sachs DH, Sprangers B, Spitzer TR, Saidman SL, Zorn E, et al. Long-term results in recipients of combined HLA-mismatched kidney and bone marrow transplantation without maintenance immunosuppression. *Am J Transplant*. 2014; 14:1599–611. doi: [10.1111/ajt.12731](#) PMID: [24903438](#)
11. Chan K, Taube D, Roufosse C, Cook T, Brookes P, Goodall D, et al. Kidney transplantation with minimized maintenance: alemtuzumab induction with tacrolimus monotherapy—an open label, randomized trial. *Transplantation*. 2011; 92:774–80. doi: [10.1097/TP.0b013e31822ca7ca](#) PMID: [21836540](#)
12. Barth RN, Janus CA, Lillesand CA, Radke NA, Pirsch JD, Becker BN, et al. Outcomes at 3 years of a prospective pilot study of Campath-1H and sirolimus immunosuppression for renal transplantation. *Transpl Int*. 2006; 19:885–92. doi: [10.1111/j.1432-2277.2006.00388.x](#) PMID: [17018123](#)
13. Li XC, Turka LA. An update on regulatory T cells in transplant tolerance and rejection. *Nat Rev Nephrol*. 2010; 6:577–83. doi: [10.1038/nrneph.2010.101](#) PMID: [20683480](#)
14. Mauri C, Blair PA. Regulatory B cells in autoimmunity: developments and controversies. *Nat Rev Rheumatol*. 2010; 6:636–43. doi: [10.1038/nrrheum.2010.140](#) PMID: [20856268](#)
15. Hutchinson JA, Riquelme P, Geissler EK. Human regulatory macrophages as a cell-based medicinal product. *Curr Opin Organ Transplant*. 2012; 17:48–54. doi: [10.1097/MOT.0b013e32834ee64a](#) PMID: [22186091](#)
16. Gao W, Lu Y, El Essawy B, Oukka M, Kuchroo VK, Strom TB. Contrasting effects of cyclosporine and rapamycin in de novo generation of alloantigen-specific regulatory T cells. *Am J Transplant*. 2007; 7:1722–32. doi: [10.1111/j.1600-6143.2007.01842.x](#) PMID: [17511761](#)
17. Krystufkova E, Sekerkova A, Striz I, Brabcova I, Girmanova E, Viklicky O. Regulatory T cells in kidney transplant recipients: the effect of induction immunosuppression therapy. *Nephrol Dial Transplant*. 2011.
18. Cherukuri A, Salama AD, Carter C, Smalle N, McCurtin R, Hewitt EW, et al. An analysis of lymphocyte phenotype after steroid avoidance with either alemtuzumab or basiliximab induction in renal transplantation. *Am J Transplant*. 2012; 12:919–31. doi: [10.1111/j.1600-6143.2011.03891.x](#) PMID: [22390816](#)
19. Hricik DE, Formica RN, Nickerson P, Rush D, Fairchild RL, Poggio ED, et al. Adverse Outcomes of Tacrolimus Withdrawal in Immune-Quirescent Kidney Transplant Recipients. *J Am Soc Nephrol*. 2015.
20. Tchao NK, Turka LA. Lymphodepletion and homeostatic proliferation: implications for transplantation. *Am J Transplant*. 2012; 12:1079–90. doi: [10.1111/j.1600-6143.2012.04008.x](#) PMID: [22420320](#)
21. Feldmann M, Maini SR. Role of cytokines in rheumatoid arthritis: an education in pathophysiology and therapeutics. *Immunol Rev*. 2008; 223:7–19. doi: [10.1111/j.1600-065X.2008.00626.x](#) PMID: [18613827](#)
22. Bruns H, Meinken C, Schauenberg P, Harter G, Kern P, Modlin RL, et al. Anti-TNF immunotherapy reduces CD8+ T cell-mediated antimicrobial activity against *Mycobacterium tuberculosis* in humans. *J Clin Invest*. 2009; 119:1167–77. doi: [10.1172/JCI38482](#) PMID: [19381021](#)
23. Scallon B, Cai A, Solowski N, Rosenberg A, Song XY, Shealy D, et al. Binding and functional comparisons of two types of tumor necrosis factor antagonists. *J Pharmacol Exp Ther*. 2002; 301:418–26. PMID: [11961039](#)
24. Scallon BJ, Moore MA, Trinh H, Knight DM, Ghayeb J. Chimeric anti-TNF- $\alpha$  monoclonal antibody cA2 binds recombinant transmembrane TNF- $\alpha$  and activates immune effector functions. *Cytokine*. 1995; 7:251–9. doi: [10.1006/cyto.1995.0029](#) PMID: [7640345](#)
25. Luger A, Schmidt M, Luger N, Pauels HG, Domschke W, Kucharzik T. Infliximab induces apoptosis in monocytes from patients with chronic active Crohn's disease by using a caspase-dependent pathway. *Gastroenterology*. 2001; 121:1145–57. PMID: [11677207](#)
26. Mazariegos GV, Reyes J, Marino IR, Demetris AJ, Flynn B, Irish W, et al. Weaning of immunosuppression in liver transplant recipients. *Transplantation*. 1997; 63:243–9. PMID: [9020325](#)
27. Vathsala A, Ona ET, Tan SY, Suresh S, Lou HX, Casasola CB, et al. Randomized trial of Alemtuzumab for prevention of graft rejection and preservation of renal function after kidney transplantation. *Transplantation*. 2005; 80:765–74. PMID: [16210963](#)

28. Knechtle SJ, Pirsch JD, H. Fechner J J, Becker BN, Friedl A, Colvin RB, et al. Campath-1H induction plus rapamycin monotherapy for renal transplantation: results of a pilot study. *Am J Transplant*. 2003; 3:722–30. PMID: [12780564](#)
29. Matz M, Beyer J, Wunsch D, Mashreghi MF, Seiler M, Pratschke J, et al. Early post-transplant urinary IP-10 expression after kidney transplantation is predictive of short- and long-term graft function. *Kidney Int*. 2006; 69:1683–90. doi: [10.1038/sj.ki.5000343](#) PMID: [16572110](#)
30. RNAeasy 96 Handbook 01/2002. Section RNeasy 96 protocol for RNA cleanup/II: Using spin technology. Germany, Hilden: Qiagen; 2002.
31. Sagoo P, Perucha E, Sawitzki B, Tomiuk S, Stephens DA, Miqueu P, et al. Development of a cross-platform biomarker signature to detect renal transplant tolerance in humans. *Journal of Clinical Investigation*. 2010; 120:1848–61. doi: [10.1172/JCI39922](#) PMID: [20501943](#)
32. Sagoo P, Perucha E, Sawitzki B, Tomiuk S, Stephens DA, Miqueu P, et al. Development of a cross-platform biomarker signature to detect renal transplant tolerance in humans. *J Clin Invest*. 2010; 120:1848–61. doi: [10.1172/JCI39922](#) PMID: [20501943](#)
33. Edgar R, Domrachev M, Lash AE. Gene Expression Omnibus: NCBI gene expression and hybridization array data repository. *Nucleic Acids Res*. 2002; 30:207–10. PMID: [11752295](#)
34. Saeed AI, Sharov V, White J, Li J, Liang W, Bhagabati N, et al. TM4: a free, open-source system for microarray data management and analysis. *Biotechniques*. 2003; 34:374–8. PMID: [12613259](#)
35. Panzer U, Steinmetz OM, Reinking RR, Meyer TN, Fehr S, Schneider A, et al. Compartment-specific expression and function of the chemokine IP-10/CXCL10 in a model of renal endothelial microvascular injury. *J Am Soc Nephrol*. 2006; 17:454–64. doi: [10.1681/ASN.2005040364](#) PMID: [16382019](#)
36. Chesneau M, Pallier A, Braza F, Lacombe G, Le Gallou S, Baron D, et al. Unique B cell differentiation profile in tolerant kidney transplant patients. *Am J Transplant*. 2014; 14:144–55. doi: [10.1111/ajt.12508](#) PMID: [24354874](#)
37. Viklicky O, Krystufkova E, Brabcova I, Sekerkova A, Wohlfahrt P, Hribova P, et al. B-cell-related biomarkers of tolerance are up-regulated in rejection-free kidney transplant recipients. *Transplantation*. 2013; 95:148–54. doi: [10.1097/TP.0b013e3182789a24](#) PMID: [23222918](#)
38. Kirk AD, Turgeon NA, Iwakoshi NN. B cells and transplantation tolerance. *Nat Rev Nephrol*. 2010; 6:584–93. doi: [10.1038/nrneph.2010.111](#) PMID: [20736924](#)
39. Jung M, Sabat R, Kratzschmar J, Seidel H, Wolk K, Schonbein C, et al. Expression profiling of IL-10-regulated genes in human monocytes and peripheral blood mononuclear cells from psoriatic patients during IL-10 therapy. *Eur J Immunol*. 2004; 34:481–93. doi: [10.1002/eji.200324323](#) PMID: [14768053](#)
40. Newell KA, Asare A, Kirk AD, Gisler TD, Bourcier K, Suthanthiran M, et al. Identification of a B cell signature associated with renal transplant tolerance in humans. *J Clin Invest*. 2010; 120:1836–47. doi: [10.1172/JCI39933](#) PMID: [20501946](#)
41. Pearl JP, Parris J, Hale DA, Hoffmann SC, Bernstein WB, McCoy KL, et al. Immunocompetent T-cells with a memory-like phenotype are the dominant cell type following antibody-mediated T-cell depletion. *Am J Transplant*. 2005; 5:465–74. doi: [10.1111/j.1600-6143.2005.00759.x](#) PMID: [15707400](#)
42. Ekberg H, Tedesco-Silva H, Demirbas A, Vitko S, Nashan B, Gurkan A, et al. Reduced exposure to calcineurin inhibitors in renal transplantation. *N Engl J Med*. 2007; 357:2562–75. doi: [10.1056/NEJMoa067411](#) PMID: [18094377](#)
43. Glotz D, Charpentier B, Abramovicz D, Lang P, Rostaing L, Rife G, et al. Thymoglobulin induction and sirolimus versus tacrolimus in kidney transplant recipients receiving mycophenolate mofetil and steroids. *Transplantation*. 2010; 89:1511–7. doi: [10.1097/TP.0b013e3181db09e4](#) PMID: [20386144](#)
44. Denecke C, Reutzel-Selke A, Sawitzki B, Boenisch O, Khalpey Z, Seifert M, et al. Low-dose cyclosporine mediates donor hyporesponsiveness in a fully mismatched rat kidney transplant model. *Transpl Immunol*. 2012; 26:176–85. doi: [10.1016/j.trim.2012.02.004](#) PMID: [22414756](#)
45. Leventhal JR, Elliott MJ, Yolcu ES, Bozulic LD, Tollerud DJ, Mathew JM, et al. Immune reconstitution/immunocompetence in recipients of kidney plus hematopoietic stem/facilitating cell transplants. *Transplantation*. 2015; 99:288–98. doi: [10.1097/TP.0000000000000605](#) PMID: [25594553](#)
46. Scandling JD, Busque S, Shizuru JA, Lowsky R, Hoppe R, Dejbakhsh-Jones S, et al. Chimerism, graft survival, and withdrawal of immunosuppressive drugs in HLA matched and mismatched patients after living donor kidney and hematopoietic cell transplantation. *Am J Transplant*. 2015; 15:695–704. doi: [10.1111/ajt.13091](#) PMID: [25693475](#)
47. Heidt S, Hester J, Shankar S, Friend PJ, Wood KJ. B-Cell Repopulation After Alemtuzumab Induction-Transient Increase in Transitional B cells and Long-Term Dominance of Naive B Cells. *Am J Transplant*. 2012.

48. Heidt S, Vergunst M, Anholts JD, Reinders ME, de Fijter JW, Eikmans M, et al. B Cell Markers of Operational Tolerance Can Discriminate Acute Kidney Allograft Rejection From Stable Graft Function. *Transplantation*. 2014.
49. Viklicky O, Hribova P, Volk HD, Slatinska J, Petrasek J, Bandur S, et al. Molecular phenotypes of acute rejection predict kidney graft prognosis. *J Am Soc Nephrol*. 2010; 21:173–80. doi: [10.1681/ASN.2008121268](https://doi.org/10.1681/ASN.2008121268) PMID: [19797166](https://pubmed.ncbi.nlm.nih.gov/19797166/)
